1 **High Throughput Fitness Profiling Reveals Loss Of GacS-GacA Regulation Improves**  
2 **Indigoidine Production In *Pseudomonas putida***

3

4 **Authors**

5 Thomas Eng<sup>1,2,5</sup>, Deepanwita Banerjee<sup>1,2,5</sup>, Andrew K. Lau<sup>1,2</sup>, Emily Bowden<sup>1,2</sup>, Robin A.  
6 Herbert<sup>1,2</sup>, Jessica Trinh<sup>1,2</sup>, Jan-Philip Prah<sup>2,3</sup>, Adam Deutschbauer<sup>4</sup>, Deepti Tanjore<sup>2,3</sup>, and  
7 Aindrila Mukhopadhyay<sup>1,2,4,\*</sup>

8

9 <sup>1</sup>Joint BioEnergy Institute, Lawrence Berkeley National Laboratory, Emeryville, CA 94608, United  
10 States

11 <sup>2</sup>Biological Systems and Engineering Division, Lawrence Berkeley National Laboratory, Berkeley,  
12 California, USA

13 <sup>3</sup>Advanced Biofuel and Bioproduct Process Development Unit, Lawrence Berkeley National  
14 Laboratory, Emeryville, CA 94608, United States

15 <sup>4</sup>Environmental Genomics and Systems Biology Division, Lawrence Berkeley National  
16 Laboratory, Berkeley, California, USA

17 <sup>5</sup>These authors contributed equally: Thomas Eng, Deepanwita Banerjee

18

19 \* Corresponding author

20 Aindrila Mukhopadhyay [amukhopadhyay@lbl.gov](mailto:amukhopadhyay@lbl.gov)

21

22 **Abstract**

23

24 *Pseudomonas putida* KT2440 is an emerging industrial microbe amenable for use with renewable  
25 carbon streams including aromatics such as *para*-coumarate (*pCA*). We examined this microbe  
26 under common stirred-tank bioreactor parameters with quantitative fitness assays using a pooled

27 transposon library containing nearly all (4,778) non-essential genes. Assessing differential fitness  
28 values by monitoring changes in mutant strain abundance over time identified 31 genes with  
29 improved fitness in multiple bioreactor-relevant parameters. Twenty-one genes from this subset  
30 were reconstructed, including GacA, a signaling protein, TtgB, an ABC transporter, and PP\_0063,  
31 a lipid A acyltransferase. Twelve deletion strains with roles in varying cellular functions were  
32 evaluated for conversion of *pCA*, to a heterologous bioproduct, indigoidine. Several mutants, such  
33 as the  $\Delta gacA$  strain improved both fitness in a bioreactor and showed an 8-fold improvement in  
34 indigoidine production (4.5 g/L, 0.29 g/g *pCA*, 23% MTY) from *pCA* as the carbon source.

35

## 36 **Introduction**

37

38 Synthetic biology has the potential to produce many new molecules of interest which are  
39 challenging to synthesize by traditional chemistry. However, economical bioproduction at  
40 industrial scale depends on optimizing many parameters, including growth under bioreactor  
41 conditions, achieving high product titers, rates, and yields (TRY), as well as utilization of as many  
42 carbon streams derived from renewable carbon feedstocks. While many new molecules can be  
43 produced at the laboratory scale, successful development of an economically-viable strain at  
44 industrial scale (20,000 L - 2,000,000 L) is estimated to cost as much as 1 billion dollars<sup>1</sup>.

45 From an economics perspective, one of the most impactful ways to improve the viability  
46 of a process is to reduce the cost of the carbon biomass used as a substrate<sup>2</sup>. The use of  
47 lignocellulosic biomass in place of pure sugars as a low-cost feedstock could make these  
48 microbial processes financially feasible for high volume, low value molecules such as biofuels<sup>3</sup>.  
49 Currently, sugars are extracted from the cellulose and hemicellulose fractions, whereas the lignin  
50 fraction has proved to be challenging to convert biologically. Baral *et al* reported that in order to  
51 be cost-competitive with petroleum-derived jet fuels, bio-jet fuels would need to be sold at a  
52 market price around \$2.5/gallon. Coproducts derived from lignin carbon streams are an

53 underexplored avenue which could help satisfy this cost ceiling<sup>3</sup>, but lignin depolymerization can  
54 yield structurally distinct aromatic compounds, each of which could be used as a carbon source<sup>4</sup>.  
55 A solution from a recent report indicates that base-catalyzed lignin depolymerization could simplify  
56 this process, allowing for the recovery of a single dominant aromatic molecule, *para*-coumarate  
57 (*pCA*)<sup>5</sup>.

58 *Pseudomonas putida* KT2440 is a promising microbe with potential for biotechnology  
59 applications; first identified as a solvent and stress tolerant microbe, a spontaneous mutation in  
60 strain mt-2 improved plasmid transformation efficiencies<sup>6,7</sup>. *P. putida* KT2440 is able to grow using  
61 *pCA* as a sole carbon source<sup>8</sup>, giving it an advantage over other microbes like *Escherichia coli* or  
62 *Saccharomyces cerevisiae*. *P. putida* natively expresses Ttg-family efflux pumps to limit *pCA*  
63 toxicity, which may export the molecule and contribute to its tolerance of ~100 mM *pCA*<sup>9-11</sup>. *P.*  
64 *putida* has been recently engineered to convert aromatic compounds to heterologous  
65 metabolites<sup>12,13</sup>, but process validation for production in larger bioreactor formats is rare. For  
66 example, at the 300 L scale, production of a native compound, medium chain length polyhydroxy  
67 alkanooates (mcl-PHA) was optimized, but in a glucose feed regime<sup>14</sup>. Moreover, there are inherent  
68 differences in the conditions used to cultivate microbial strain in a shake flask vs. the conditions  
69 in which bioproduction will finally be deployed (e.g. uniform C source, pH, DO)<sup>15,16</sup>. This could be  
70 especially impactful on obligate aerobes such as *P. putida*<sup>17</sup>. To de-risk the scaling-up of any new  
71 microbial process, insights derived from cell physiology in stirred tank bioreactors could clarify  
72 how native cellular processes in *P. putida* are different from laboratory cultivation conditions.

73 While rationally-engineered gene deletions may improve specific aspects of cell growth or  
74 productivity, gene deletions in seemingly-unrelated processes have also yielded increases in  
75 heterologous protein activity<sup>18,19</sup>. These studies motivate the use of unbiased screens to identify  
76 factors which improve expression of heterologous gene products at bioreactor scales. Querying  
77 single gene mutants from a pooled *P. putida* mutant library could identify genes and regulatory  
78 networks required for robust growth in bioreactors. The quantitative fitness method using pooled

79 barcoded transposon library we use is called RB-TnSeq and has been described for *P. putida*  
80 KT2440<sup>20</sup>.

81 In this work, we used fitness profiling data to identify candidates for reconstruction as  
82 isogenic deletion strains. In turn, we examined the bioconversion of *pCA* to a heterologous  
83 product, indigoidine, in bioreactors. We identified that inactivating a two component regulatory  
84 system (GacS-GacA, also known as UvrY-BarA in *E. coli*) led to improved product titers of the  
85 heterologous gene pathway for indigoidine production when fed *pCA* as a carbon source.

86

## 87 **Results**

### 88 **A core cellular signature for growth under varied process parameters in bioreactors using** 89 **functional genomics**

90 We designed an experimental regime to identify *P. putida* mutants with changed fitness  
91 under conditions relevant to industrial cultivation. In contrast to lab scale experiments in shake  
92 flasks, culture tubes or microtiter plates, biomanufacturing processes for microbes implements  
93 cultivation in impeller-mixed jacketed tanks, where gases (ie, ambient air, oxygen) and nutrients  
94 (sugars, nitrogen sources) are added to the microbial culture during a given process<sup>15,16,21</sup>.

95 Using a pooled barcoded transposon mutant library in *P. putida* KT2440 we were able to  
96 rapidly evaluate ~100,000 unique transposon mutants covering nearly all (~4,800) non-essential  
97 genes with quantitative fitness assays. These cultures of pooled mutants were grown in  
98 bioreactors (**Figure 1A**) under conditions as outlined in **Table 1** to characterize differential fitness  
99 changes across timepoints and process conditions. Quantifying changes in barcode abundance  
100 allows rapid identification of the specific mutants and their respective fitness values in a workflow  
101 referred to as RB-TnSeq<sup>22</sup>. In *P. putida*, this method has been used in predicting carbon catabolic  
102 pathways and the characterization of growth inhibitors<sup>23–25</sup>. Comparing fitness values from stirred  
103 tank conditions to laboratory scale experiments would allow identification of mutants with fitness

104 changes across format and process conditions to distinguish from mutations which generally  
105 impacted strain fitness across all conditions.

106 For each sample, we were able to calculate the fitness and a corresponding *t*-score for  
107 single transposon mutants for each of the 4,778 genes in the pooled library. The calculated fitness  
108 value for each timepoint is the log<sub>2</sub> ratio of the population abundance for the sampled timepoint  
109 over the initial mutant abundance measured at the start of each experimental time course. The *t*-  
110 score assesses how reliably a fitness value is different from zero. For most conditions, most genes  
111 do not have a measurable differential fitness value and therefore have fitness values and *t* scores  
112 close to 0. For our genome-wide analysis, we selected strong, statistically significant determinants  
113 of fitness and demanded that fitness values must be >1.5 or <-2 with an absolute *t* score of >2.  
114 Volcano plots of mutant fitness values and their corresponding *t* scores are plotted for five  
115 representative experiments in **Figure 1B**.

116 From this dataset we identified thirty-five transposon mutants in *P. putida* which displayed  
117 growth defects under these conditions as displayed in **Figure 1C**. Hierarchical clustering of  
118 mutants that had decreased fitness (less than -2) indicated that most bioreactor samples fed  
119 glucose were similar to samples fed glucose in the shake flask format, but had different responses  
120 when cells were fed *pCA*. For conditions listed in **Table 1**, mutants with decreased fitness were  
121 recovered in near-complete amino acid biosynthesis pathways for methionine, and tryptophan.  
122 Other amino acid pathways were partially identified, such as for leucine, arginine, and aspartate.  
123 Pathways predicted for sulfur relay and thiamine biosynthesis (PP\_0261, PP\_1233, PP\_5104) or  
124 metal ion homeostasis (PP\_3506, PP\_0910) were also implicated for robust growth under  
125 bioreactor conditions (**Supplementary Data 1**). We observed that when the genes were  
126 clustered, two additional uncharacterized genes (PP\_0292, PP\_0289) also were present in this  
127 group, suggesting they have related functions. Nineteen mutants were unique to growth on *pCA*.  
128 These included transcriptional regulators and metabolic genes in pathways related to aromatic  
129 compound catabolism already described elsewhere<sup>24</sup>. Including *pCA* fitness profiling data from

130 the Price *et al*<sup>20</sup> dataset also strengthened evidence for statistically significant fitness defects in  
 131 other metabolic genes including PP\_5095/*proI* (involved in proline biosynthesis), PP\_0356/*glcB*  
 132 (malate synthase), PP\_4700/*panC* (pantothenate synthase) and PP\_4799 (a putative  
 133 muramoyltetrapeptide carboxypeptidase).

134

135 **Table 1.** Summary of conditions and cultivation formats tested in this study for quantitative  
 136 fitness analysis with the *P. putida* KT2440 RB-TnSeq library. All experiments were conducted at  
 137 30 °C. Samples 17 and 18 were described in Price *et al*, 2019<sup>20</sup>; samples 19 and 20 were  
 138 described in Incha *et al* 2020<sup>24</sup>.

| No. | Sample ID     | Culture Format/Scale     | Base Media | Time point Sampled, Replicate Number | Feed Mode & Carbon Source | Dissolved Oxygen Setpoint |
|-----|---------------|--------------------------|------------|--------------------------------------|---------------------------|---------------------------|
| 1   | Shake Flask-1 | 250 mL shake flask       | M9         | 48h, R1                              | Batch, Glucose            | NA                        |
| 2   | Shake Flask-2 | 250 mL shake flask       | M9         | 72h, R1                              | Batch, Glucose            | NA                        |
| 3   | Shake Flask-3 | 250 mL shake flask       | M9         | 48h, R2                              | Batch, Glucose            | NA                        |
| 4   | Shake Flask-4 | 250 mL shake flask       | M9         | 72h, R2                              | Batch, Glucose            | NA                        |
| 5   | Shake Flask-5 | 250 mL shake flask       | M9         | 48h, R3                              | Batch, Glucose            | NA                        |
| 6   | Shake Flask-6 | 250 mL shake flask       | M9         | 72h, R3                              | Batch, Glucose            | NA                        |
| 7   | 2L-1          | 2 L Sartorius Bioreactor | M9         | 24 h, R1                             | Batch, Glucose            | 10%                       |
| 8   | 2L-2          | 2 L Sartorius Bioreactor | M9         | 48 h, R1                             | Batch, Glucose            | 10%                       |
| 9   | 2L-3          | 2 L Sartorius Bioreactor | M9         | 72 h, R1                             | Batch, Glucose            | 10%                       |
| 10  | 2L-4          | 2 L Sartorius Bioreactor | M9         | 48 h, R2                             | Batch, Glucose            | 10%                       |
| 11  | 2L-5          | 2 L Sartorius Bioreactor | M9         | 72 h, R2                             | Batch, Glucose            | 10%                       |

|    |              |                          |      |          |                    |     |
|----|--------------|--------------------------|------|----------|--------------------|-----|
| 12 | 2L-6         | 2 L Sartorius Bioreactor | M9   | 24 h, R1 | Batch, Glucose     | 30% |
| 13 | 2L-7         | 2 L Sartorius Bioreactor | M9   | 48 h, R1 | Batch, Glucose     | 30% |
| 14 | 2L-8         | 2 L Sartorius Bioreactor | M9   | 72 h, R1 | Batch, Glucose     | 30% |
| 15 | 2L-12        | 2 L Sartorius Bioreactor | M9   | 24 h, R1 | Fed Batch, Glucose | 30% |
| 16 | 2L-13        | 2 L Sartorius Bioreactor | M9   | 40 h, R1 | Fed Batch, Glucose | 30% |
| 17 | <i>pCA-1</i> | 24 well plate            | RCH2 | R1       | Batch, <i>pCA</i>  | NA  |
| 18 | <i>pCA-2</i> | 24 well plate            | RCH2 | R2       | Batch, <i>pCA</i>  | NA  |
| 19 | <i>pCA-3</i> | 96 deep well plate       | MOPS | R1       | Batch, <i>pCA</i>  | NA  |
| 20 | <i>pCA-4</i> | 96 deep well plate       | MOPS | R2       | Batch, <i>pCA</i>  | NA  |

139

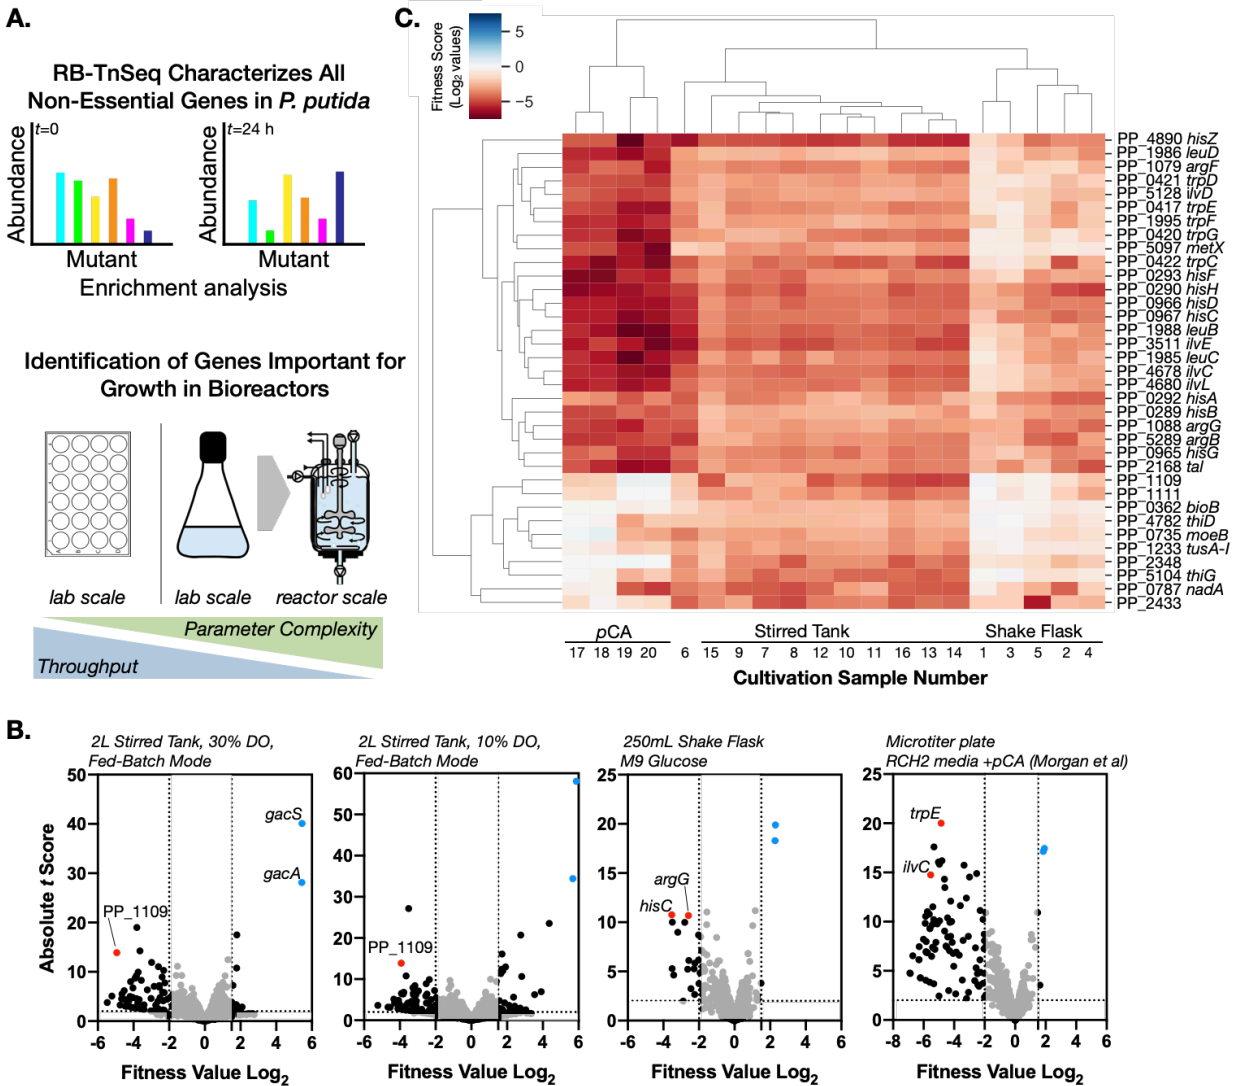

140

141 **Figure 1. *Pseudomonas putida* Fitness Profiling Using Varied Process Parameters Conditions Reveals**  
 142 **Gene Pathways Required for Robust Growth.** a) Schematic of workflow. RB-TnSeq tracks differential  
 143 mutant abundance across timepoints and conditions (refer to Table 1). Mutant abundance is tracked over  
 144 time for a given condition and normalized to the initial abundance at  $T_0$ . b) Volcano plots of four  
 145 representative RB-TnSeq experiments. Strong fitness defects are indicated with dotted lines indicating  
 146 cutoff values. For fitness, a cutoff threshold for  $\text{log}_2$  values  $> 1.5$  or  $< -2.0$  was used. For absolute  $t$  scores,  
 147 the threshold chosen was  $t > 2$ . Fitness values for mutants in a two-component signaling system, GacS-  
 148 GacA, is highlighted in blue. Several mutants that also appear in panel c are indicated in red. c) Hierarchical  
 149 clustered heatmap for 35 gene mutants that were fitness-compromised for bioreactor conditions showing  
 150 their corresponding fitness profile under laboratory cultivation with either glucose or  $pCA$  as the carbon  
 151 source. Both genes and conditions are clustered.

152

153 A number of regulatory systems were also identified that have not been found to have a

154 fitness phenotype in earlier studies, suggesting that bioreactor conditions generated several



155 previously uncharacterized global stress responses. Deletion of either the sigma-38 stress  
156 response sigma factor (PP\_1623/*rpoS*) or housekeeping sigma factor sigma-70 (PP\_4208)  
157 strongly decreased fitness in the bioreactor. Other *P. putida* RB-TnSeq datasets did not show the  
158 deletion of either sigma factor to have fitness defects (unpublished results, RB-TnSeq fitness  
159 browser, <https://bit.ly/3bifz2h>), suggesting that the fitness enhancement in a bioreactor is  
160 enhanced by both sigma-38 and sigma-70 transcriptional regulation, and that their regulatory  
161 network is not redundant. Additionally, four environmental/nutrient availability sensing two-  
162 component signaling systems were also implicated in bioreactor fitness (**Figure 1,**  
163 **Supplementary Data 1**): a nitrogen stress sensor (PP\_2388-PP\_2390)<sup>26</sup>; a sensor implicated in  
164 chloramphenicol resistance (PP\_0185)<sup>27</sup>; a sensor implicated in lipid A remodeling (PP\_2348);  
165 and a two component system important for adaptation to growth in minimal media (PP\_4505-  
166 PP\_2714). The specific environmental signals which activate these remaining two component  
167 signaling systems have not been identified.

168 Other mutants which decrease fitness in bioreactors included mutations in PP\_5303/*ridA*,  
169 a reactive oxygen species responsive chaperone, or PP\_0735/*moeB*, an adenylyltransferase which  
170 adenylylates molybdopterin synthase, were deficient for growth. Finally, mutations in four other  
171 genes could not be assigned a function due to low homology to previously characterized genes  
172 or correlation with known processes. In summary, we have identified a core cellular signature for  
173 growth under a variety of common process parameters in bioreactors using a functional genomics  
174 approach.

175

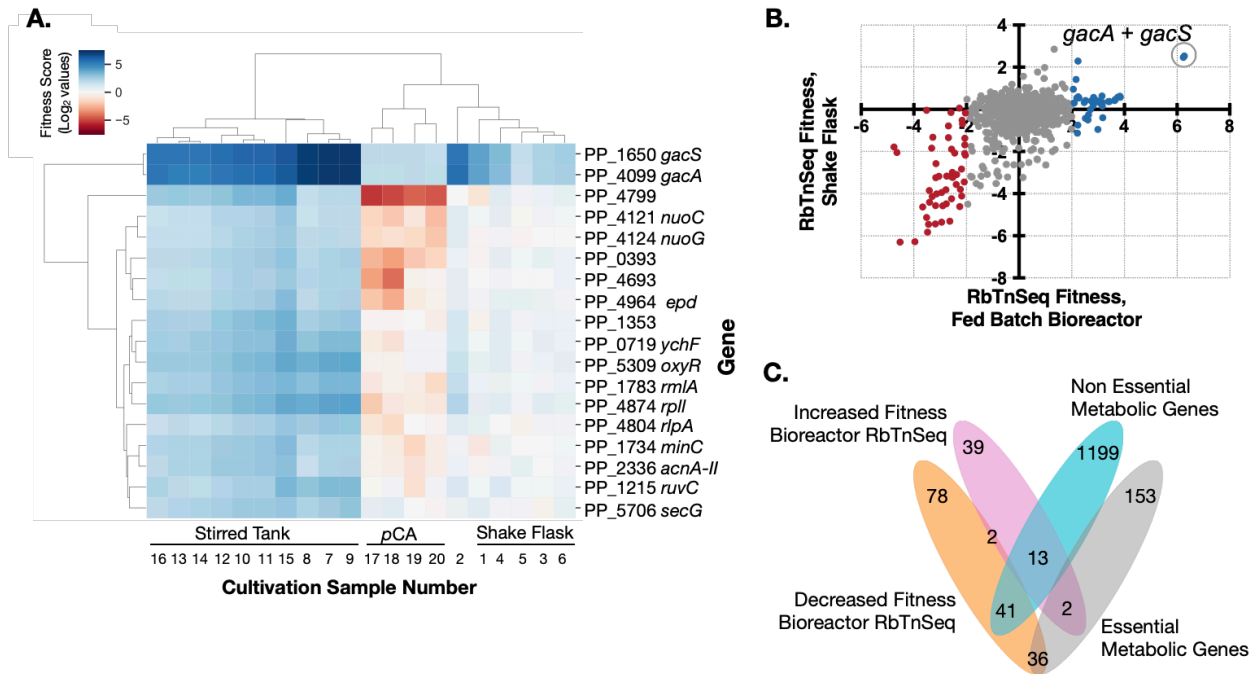

176

177 **Figure 2. Identification of *P. putida* Enhanced Growth Mutants.** a) Heatmap for 18 gene mutants with  
 178 enhanced fitness (fitness value greater than 1.5) across all bioreactor condition data points compared to  
 179 fitness value under laboratory conditions using *pCA* in microtiter plates or glucose in shake flask as the  
 180 sole carbon source. Refer to Table 1 for a full description of conditions corresponding to the sample  
 181 numbers. b) Scatter plot showing the fitness values of mutants with enhanced fitness (red, fitness values  
 182 >2) or compromised fitness (blue, fitness values <2) under grown in shake flask vs. a fed-batch bioreactor.  
 183 c) Venn diagram indicating distribution of genes binned into four different categories from the transposon  
 184 mutant pool using fitness profiling values from bioreactor fitness experiments and gene essentiality.

185

186

187

188

189

190

191

192

193

While the negative fitness values from the RB-Tnseq method identified cellular sensitivities in bioreactors, we reasoned that mutants with improved fitness values could also be leveraged for biotechnological applications. Hierarchical clustering of positive fitness mutants across all bioreactors in comparison with *pCA* and shake flask conditions indicated that a fitness signature in the bioreactor was distinct from either standard laboratory format using the aromatic carbon source or glucose (**Figure 2A**). We identified transposon mutants in eighteen genes which consistently exhibited quantitatively improved fitness under these growth conditions in a bioreactor and are plotted with hierarchical clustering in **Figure 2A**. Additionally, a two component

194 signaling system, *gacS-gacA* (PP\_1650-PP\_4099), was routinely recovered as a fitness  
195 enhanced mutant under many conditions (**Figure 2A** and **2B**).

196 Approximately half of the mutants identified from these fitness profiling experiments were  
197 related to metabolic processes (**Figure 2C**). The remaining non-metabolic candidates (described  
198 in **Supplementary Data 2**) encoded a diverse range of cellular functions, such as PP\_1215/*ruvC*  
199 (a crossover junction endodeoxyribonuclease), PP\_1353 (an uncharacterized conserved  
200 membrane protein), and PP\_5309 (a LysR-family transcriptional regulator). Inactivating  
201 PP\_1428/*rpoE* (Sigma factor sigma-E) led to a slight fitness improvement in most of the bioreactor  
202 conditions tested by RB-TnSeq, but not in the control shake flask experiments. Many of these  
203 genes likely encode global master regulators and their deletion have pleiotropic impacts across  
204 cell physiology. In summary, we identify these gene loci that are potential gene targets (**Table**  
205 **2**), whose inactivation would result in improved fitness in a bioreactor including metabolic genes  
206 as well as non-metabolic global regulators across varied oxygen and mixing conditions in  
207 bioreactors.

208

### 209 ***The bioconversion of a lignin derived aromatic to a heterologous bioproduct***

210

211 The RB-TnSeq functional genomics analysis indicated that inactivating a small number of  
212 cellular processes would lead to improved fitness in a bioreactor. In addition, we included two  
213 other analyses to capture additional useful improvements. Specifically, we included mutants  
214 which have higher fitness values in stirred tank bioreactors when compared to the shake flask  
215 format. We calculated differential fitness values as the ratio of  $\log_2$  fitness values in a bioreactor  
216 over shake flask cultivation as the denominator, which indicated a small number of genes should  
217 be included even though they did not have strong absolute fitness improvements or *t* scores that  
218 would otherwise meet the threshold. From this analysis 14 additional genes related to metabolism  
219 were identified. We evaluated how deleting these individual metabolic genes for their potential

220 impact on maximum biomass yields using minimization of metabolic adjustment (MOMA)  
 221 method<sup>28</sup> when fed glucose or *p*CA as carbon sources. MOMA analysis predicted the immediate  
 222 effect of a gene deletion with minimum perturbation in the metabolic flux distribution compared to  
 223 wild type *P. putida*. Of the 14 genes, PP\_0290 was predicted to be essential *in silico* for growth  
 224 using both glucose or *p*CA as sole carbon source. All thirty-three genes that met at least one of  
 225 these criteria are described in **Supplementary Table 1**.

226 The RB-TnSeq workflow under these process conditions enabled rapid characterization  
 227 of nearly all non-essential *P. putida* mutants (**Figure 1A**). However, to use these improved chassis  
 228 we built isogenic deletion mutants for each enhanced fitness mutant using allelic exchange  
 229 plasmids targeting each locus for deletion (**Figure 3A and Supplementary Table 1**). Consistent  
 230 with the potential for heterozygous alleles in *P. putida*<sup>29</sup>, we were unable to generate deletion  
 231 mutants for twelve candidate genes (**Supplementary Table 1**), but were successful in completing  
 232 a library of thirteen deletion mutant strains (**Table 2**) to test for heterologous bioproduct formation,  
 233 as modeled with the 2 gene non-ribosomal peptide (NRP), indigoidine. Indigoidine is generated  
 234 from the condensation of two glutamine molecules (**Supplementary Figure 1**) and is catalyzed  
 235 by a heterologous non-ribosomal peptide synthetase (NRPS) based pathway<sup>30-32</sup>.

236  
 237 **Table 2. Fitness-Enhanced Deletion Mutants in this Study.** Genes are first sorted as metabolic or non-  
 238 metabolic, and next sorted according to genomic locus ID from smallest to largest values. If known,  
 239 common gene names are also indicated. The complete list of loci targeted for deletion, including newly  
 240 identified essential genes, is described in Supplemental Table 1.

| Gene Locus/<br>Gene Name | Maximum<br>Fitness<br>Value in<br>Bioreactor <sup>#</sup> | Fold Fitness<br>Improvement in<br>Bioreactor <sup>\$</sup> | Gene Function                               | Predicted<br>Biomass<br>Yields<br>(gDCW/mm<br>ol of<br>glucose) | Predicted<br>Biomass<br>Yields<br>(gDCW/mm<br>ol of <i>p</i> CA) |
|--------------------------|-----------------------------------------------------------|------------------------------------------------------------|---------------------------------------------|-----------------------------------------------------------------|------------------------------------------------------------------|
| PP_1109                  | -5.2                                                      | 16.2                                                       | GntR-family<br>transcriptional<br>regulator | Non<br>Metabolic                                                | Non<br>Metabolic                                                 |
| PP_2889/ <i>prrR</i>     | 4                                                         | 5.6                                                        | Transmembrane                               | Non                                                             | Non                                                              |

|                                  |     |      | regulator; anti-sigma factor                          | Metabolic     | Metabolic     |
|----------------------------------|-----|------|-------------------------------------------------------|---------------|---------------|
| PP_4099/ <i>gacA</i>             | 7.2 | 1.37 | Two component signaling system                        | Non Metabolic | Non Metabolic |
| PP_0063                          | 2.4 | 1.7  | Lipid A biosynthesis lauroyl acyltransferase          | 0.1           | 0.11          |
| PP_1385/ <i>ttg1B</i>            | 0.9 | 3.6  | RND membrane pump; implicated in <i>pCA</i> tolerance | 0.1           | 0.11          |
| PP_1656/ <i>relA</i>             | 4.5 | 0.5  | ATP:GTP 3'-pyrophosphotransferase; pppGpp synthetase  | 0.1*          | 0.11          |
| PP_2336                          | 3.1 | 8.3  | Aconitate hydratase 1                                 | 0.1           | 0.11          |
| PP_4120/ <i>nuoB</i>             | 2.7 | 4    | NADH-quinone oxidoreductase subunit B                 | 0.04*         | 0.05          |
| PP_4121/ <i>nuoC<sub>D</sub></i> | 2.8 | 11.6 | NADH-quinone oxidoreductase subunit C+D               | 0.04*         | 0.05          |
| PP_4124/ <i>nuoG</i>             | 2.8 | 13.9 | NADH-quinone oxidoreductase subunit G                 | 0.04*         | 0.05          |
| PP_4129                          | 3.2 | 6.9  | NADH-quinone oxidoreductase subunit L                 | 0.04*         | 0.05          |
| PP_5227                          | 1.7 | 6    | Diaminopimelate decarboxylase                         | 0.1           | 0.11          |
| PP_5338/ <i>aspA</i>             | 2.5 | 4.3  | Aspartate ammonia lyase                               | 0.1           | 0.11          |

241 \$ Fitness value in bioreactor versus fitness value in shake flask  
 242 # Maximum fitness value across all bioreactor conditions tested  
 243 \* No solution for indigoidine flux using MOMA analysis (see Supplementary Table 3 and materials  
 244 and methods)  
 245

246 To test indigoidine production, we selected a subset of mutants that showed the most  
 247 promise either by metabolic modeling or by mining the literature for potential roles in processes  
 248 related to glutamine synthesis, the immediate precursor to indigoidine. The benefit to biomass  
 249 formation ideally should not come at the cost of bioproduct titer, rates, and yields<sup>33,34</sup>. Deletions  
 250 of metabolic genes were also analyzed for their potential impact on indigoidine titer. Using a

251 genome scale metabolic model of *P. putida*, iJN1462<sup>35</sup> and Flux Balance Analysis (FBA), we  
 252 calculated maximum theoretical yields (MTY) of indigoidine and its precursors for this  
 253 carbon/substrate pair (**Supplementary Table 2**). This carbon source to final product MTY pair  
 254 (*p*CA/indigoidine) of 0.66 mol/mol is higher than MTY calculated for the glucose/indigoidine pair  
 255 of 0.54 mol/mol<sup>36</sup>. The predicted flux towards indigoidine in these mutants is summarized in **Table**  
 256 **2** and **Supplementary Table 3**. For several mutants, indigoidine yields were unlikely to  
 257 substantially improve yield, but would still allow yields approximately 80 - 100% of WT. Six of the  
 258 thirteen deletion mutants analyzed had no solution when calculating indigoidine flux using MOMA  
 259 analysis when fed glucose, but solutions did exist for *p*CA feed conditions (**Table 2**). These model  
 260 predictions suggested there might be improvements to final product titer in these deletion strains.  
 261 The indigoidine production pathway was then integrated into these deletion strains to produce the  
 262 heterologous final product.

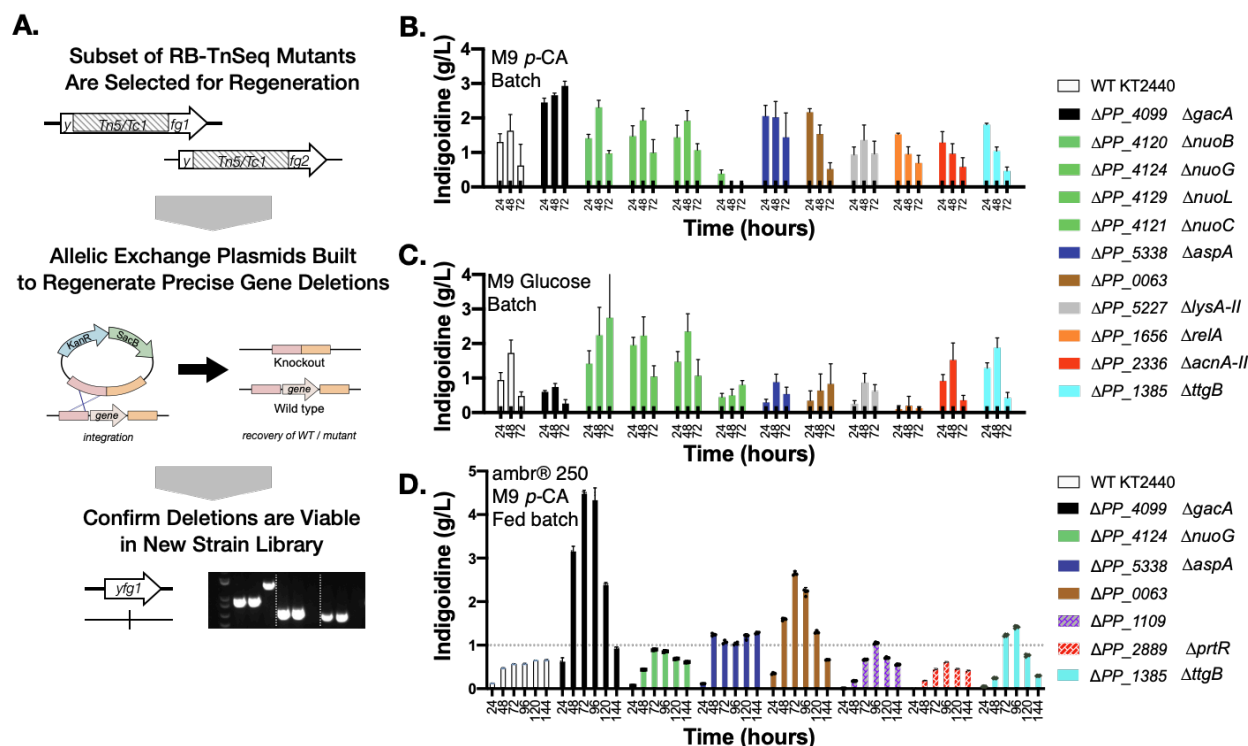

263  
 264 **Figure 3. Indigoidine productivity in isogenic deletion strains across scales.** A. Workflow to build new  
 265 isogenic deletion mutants. B. Indigoidine production in batch mode using *p*CA as carbon source C.  
 266 Indigoidine production in batch mode using glucose as the carbon source. Single deletions in the nuo

267 holocomplex are indicated in green. Otherwise, deletions are arranged by decreasing titer. For B and C,  
268 error bars indicate SD and n=3 from independent biological replicates. D. Fed-batch mode production of  
269 indigoidine using *pCA* as the carbon source from n=3 technical replicates.

270

271 We selected thirteen deletion mutants for indigoidine production in the laboratory scale  
272 format which had various range of biological functions, fitness values, or biomass predictions from  
273 MOMA analysis (**Table 2**). These included 9 metabolic genes and  $\Delta gacA$  among the remaining  
274 non metabolic genes. As controls, we included  $\Delta ttgB$  to test if reducing *pCA* efflux could allow  
275 greater substrate availability for catabolism<sup>27,37</sup>;  $\Delta PP\_1109$  which exhibited negative fitness  
276 values in the bioreactor; and  $\Delta PP\_2889$  which the RB-TnSeq data was more fit only under batch-  
277 mode conditions but not fed-batch modes (**Table 1**). The remaining genes in **Table 2** showed  
278 either differential or absolute fitness improvements in the bioreactor scale compared to the shake  
279 flask format.

280 Strains were assayed first in 24-deepwell plates to compare indigoidine production using  
281 either glucose or *pCA* as the carbon source. In this format, the WT strain produced about 1.5 g/L  
282 of indigoidine from either glucose or *pCA* as the carbon source after 48 hours of cultivation. In  
283 contrast,  $\Delta gacA$  strains produced 2.5 g/L of indigoidine after 48 hours using *pCA* (**Figure 3B**) but  
284 only 0.5 g/L indigoidine from glucose (**Figure 3C**). Several subunits of the NADH-quinone  
285 oxidoreductase complex (PP\_4120, PP\_4124, PP\_4129) led slight improvements in indigoidine  
286 titer when cells were fed glucose, but not *pCA*. While these proteins are thought to function as  
287 part of a single holocomplex, the differences in indigoidine production are consistent with the  
288 differences in transposon mutant fitness (**Table 2**). Deletion strains  $\Delta PP\_2889$ ,  $\Delta PP\_5338$ ,  
289  $\Delta PP\_0063$ ,  $\Delta PP\_5227$ ,  $\Delta PP\_1656$ ,  $\Delta PP\_2336$ , and  $\Delta PP\_1385$  also showed improved indigoidine  
290 titer on *pCA* but not on glucose (**Figure 3, Supplementary Figure 2**).  $\Delta PP\_1109$  which had a  
291 negative fitness in bioreactors, did not improve indigoidine titer (**Supplementary Figure 2**). In  
292 summary, we identified several mutants with improved indigoidine production from *pCA*, which  
293 allowed us to further down-select candidate strains for bioreactor runs.

294 Automation-assisted fed-batch bioreactors (Ambr® 250) enable medium throughput  
295 analysis in stirred tank bioreactors and were used to examine the most promising four deletion  
296 mutant strains for indigoidine production ( $\Delta gacA$ ,  $\Delta PP\_4124$ ,  $\Delta PP\_5338$ , and  $\Delta PP\_0063$ ). In this  
297 scaleup,  $\Delta gacA$  strains produced 4.5 g/L indigoidine after 72 hours, whereas the WT strain  
298 produced 0.5 g/L in the same timeframe.  $\Delta PP\_0063$  also showed some improvement over the  
299 WT strain with a titer of 2.5 g/L. Deletion strains  $\Delta PP\_4124$  or  $\Delta PP\_5338$  did not further improve  
300 indigoidine titer in the bioreactor. The remaining control strains performed as expected; a  
301 representative deletion strain with a negative fitness value ( $\Delta PP\_1109$ ) did not produce more  
302 indigoidine than wild type; reducing *pCA* efflux ( $\Delta ttgB$ ) or optimizing for growth under batch mode  
303 conditions ( $\Delta PP\_2889$ ) also failed to improve titer. The indigoidine yield from the control strain  
304 was 0.034 g indigoidine / g *pCA*, and the yield from the  $\Delta gacA$  production strain was 0.29 g  
305 indigoidine/ g *pCA*, an 8.5 fold improvement over wild type. The  $\Delta gacA$  strain reached 29% MTY  
306 (indigoidine / *pCA*) under fed-batch conditions. This result demonstrates a successful application  
307 of fitness profiling of deletion libraries for improved bioconversion route to produce indigoidine  
308 when fed a lignin-derived monomer as the sole carbon source.

309

## 310 **Discussion**

311 In this study, we have used high throughput functional genomic approaches to identify  
312 genetic enhancers in *P. putida* which improve growth in bioreactors under a range of process  
313 conditions. *P. putida* is of special interest as a host for scalable and sustainable production due  
314 to its ability to metabolize aromatic components of plant feedstocks such as *pCA*. The key  
315 discovery in this study is that we identified a gene target that improves fitness in a bioreactor and  
316 also under certain conditions enhances production of a model heterologous product. Our study  
317 describes the distinct fitness landscape of scaleup conditions on cells, explaining why larger  
318 format processes are so unpredictable based on performance at the laboratory scale. Due to the  
319 pooled nature of our high-throughput assay, disrupted gene pathways that utilize metabolites



320 which can be complemented by secreted metabolites from other mutants in the population will  
321 not be detected in this assay. Regardless, our negative fitness mutants identify important genes  
322 to avoid inactivating when considering genome scale approaches for host optimization<sup>38</sup>.

323 We have quantified the differences between bioreactors and shake flasks and  
324 demonstrated that stirred tank bioreactor conditions pose a burden on cell physiology with a  
325 distinct signature from that of conventional laboratory growth conditions in the same minimal  
326 media. An earlier report examined the budding yeast deletion collection and observed that  
327 analogous defects in amino acid biosynthesis pathways impaired cell survival under low  
328 temperature and high pressure conditions<sup>39</sup>. We also show that global stress response pathways,  
329 such as sigma-38 (RpoS) and sigma-70 (RpoD), were implicated as providing non-redundant  
330 stress responses for efficient growth in bioreactors. These stress-responsive transcription factors  
331 can parse many different nutritional and environmental changes; for example, in *E. coli* the RpoS  
332 response is modulated by intracellular glutamate concentrations. Changes in glutamate binding  
333 to the RpoS holoenzyme dictate the subset of activated downstream genes in a stress response<sup>40</sup>.  
334 While bioreactor conditions may be far more controlled compared to its native soil habitat, this  
335 study indicates that *P. putida* has a full genetic complement ready to respond to the  
336 heterogeneous oxygen and variable nutrient cycles we insult these cells with.

337 Scalability is unpredictable; not all global regulators are required for robust growth in  
338 stirred tank bioreactors. In a related study, the Crc protein was identified as a global regulator  
339 whose inactivation has been demonstrated to improve product formation (cis, cis muconic acid)  
340 from *pCA* under laboratory cultivation conditions<sup>13</sup>. However, when translated to an aromatics and  
341 sugar co-utilizing engineered *P. putida* strain, *crc* deficient cells exhibited a significant lag phase  
342 under bioreactor growth conditions<sup>41</sup>. As we did not identify *crc* as a positive fitness mutant in our  
343 analysis of bioreactor-advantaged strains, we instead argue optimizing strains for bioproduct  
344 formation using laboratory settings may be inadequate; the same optimizations can have negative  
345 implications upon scale-up.

346

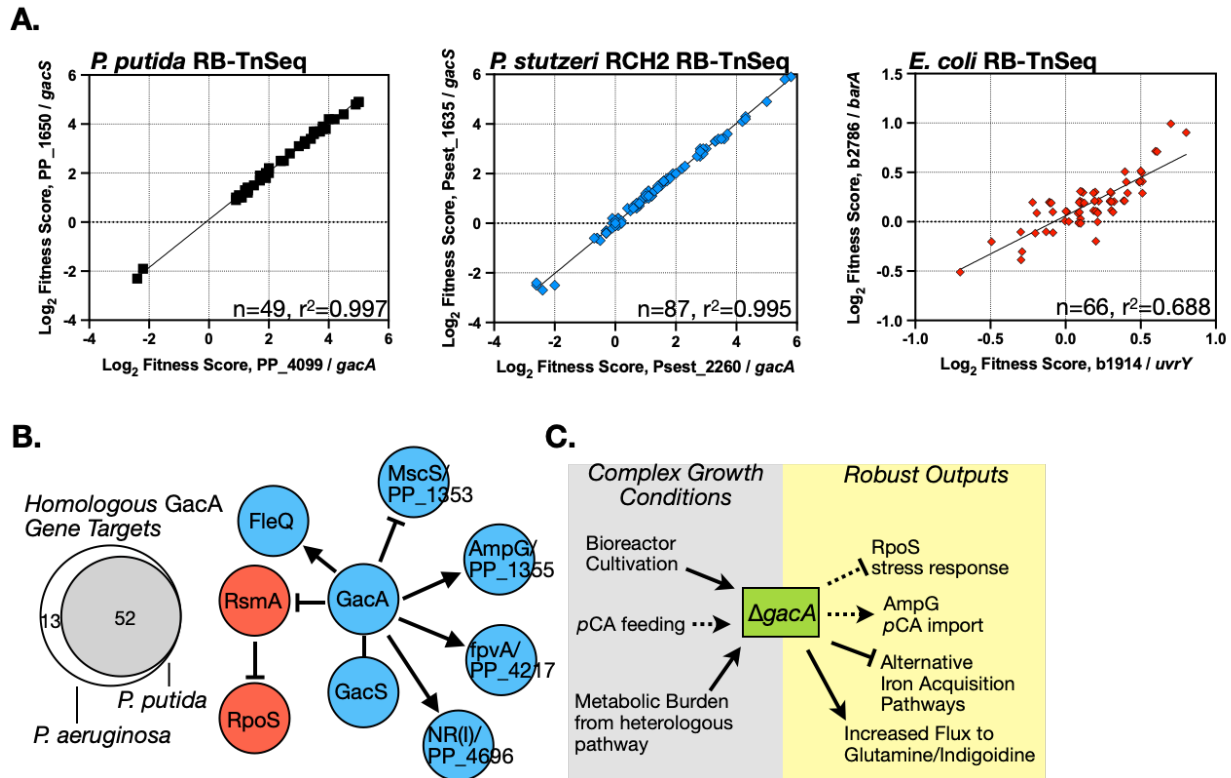

347

348 **Figure 4. Functional Differences Between GacS-GacA And Putative *E. coli* Homolog BarA-UvrY. A.**

349 Meta-analysis of fitness values for GacS-GacA mutants across several different conditions for three  
 350 different microbes, *P. putida*, *P. stutzeri* and *E. coli* using RB-TnSeq data. B. and C. Model.  $\Delta gacA$  cells  
 351 parse many nutrient and environmental signals and improve formation of a glutamine-derived product,  
 352 indigoidine.

353

354 In *Pseudomonas aeruginosa*, the GacS-GacA system is known to be implicated in a

355 remarkably wide range of conditions<sup>42-44</sup> and in *P. putida*, was recently shown to have a role in

356 muconate production from glucose<sup>45</sup>. In our study, the GacS-GacA two component signaling

357 system was found to not only be a prominent deletion target for improving fitness but also an

358 unanticipated route to improve heterologous product formation from  $\rho$ CA. A meta-analysis of

359 functional genomics data from all public RB-TnSeq datasets (**Supplementary Table 4 and 5**)

360 indicates that the *P. putida* GacS-GacA system may have little crosstalk amongst other signaling

361 systems, as mutants in *gacS* strongly phenocopy *gacA* mutants (**Figure 4A**). In contrast, a

362 correlation analysis of the better characterized *E. coli* homologous GacS-GacA signaling system  
363 shows a weaker correlation ( $r^2$  for *P. putida* = 0.997;  $r^2$  for *P. stutzeri* = 0.995;  $r^2$  for *E. coli* = 0.688).  
364 Moreover, the absolute fitness values for *E. coli* *gacA* or *gacS* homolog mutants do not indicate  
365 any strong, biologically relevant phenotypes. With only ~25% identity between *E. coli* and *P.*  
366 *putida* *gacS* homologs, knowledge from *E. coli* is not translatable to *P. putida*. Regardless, this  
367 dataset implies that there may be important differences in how these signaling systems function  
368 between these organisms, which biases our literature survey to favor experimental evidence from  
369 *Pseudomonads* over *E. coli*.

370 The deletion libraries chosen to test for improved indigoidine production profiling based  
371 on the fitness landscape of *P. putida* under bioreactor conditions had different production  
372 phenotypes when using these two carbon sources, specifically the  $\Delta gacA$  deletion strain. Glucose  
373 is consumed through the ED-EMP pathway<sup>46</sup> whereas *pCA* is utilized through the beta  
374 ketoadipate pathway<sup>10</sup>. Several known downstream targets of GacA (small RNAs *rsmX*, *rsmY*,  
375 *rsmZ*; *grxD*)<sup>47,48</sup> are not included in the RB-TnSeq analysis pipeline, which is a shortcoming of this  
376 method for identifying small RNA based regulation. However, a stringDB meta-analysis<sup>49</sup> also  
377 identified potentially conserved protein-protein interactions between GacA and other relevant  
378 candidate effector proteins (**Supplementary Figure 3**). We hypothesize that an active GacS-  
379 GacA signalling system may induce formation of diverse secondary metabolites, biofilm formation  
380 and alternative iron sequestration pathways and these pleiotropic processes limit the carbon flux  
381 available for indigoidine production (**Figure 4B**). In parallel, the constitutive derepression of an  
382 outer membrane permease (PP\_1355), also regulated by this signaling system, could improve  
383 *para*-coumarate transport. Consistent with this, the inactivation of PP\_1355 caused a fitness  
384 defect when cells were grown on *pCA* as a carbon source<sup>20</sup>. The improvement to indigoidine titer  
385 in  $\Delta gacA$ ,  $\Delta ttgB$  and  $\Delta PP\_0063$  strains, the three best indigoidine producers, occurred with *pCA*  
386 rather than glucose. While additional experiments are required to fully understand this outcome,  
387 aromatic molecules like toluene are known to induce a starvation response<sup>50</sup> and occur in *pCA*.

388 Without *gacS* present, the *rpoS* response is dampened<sup>51</sup>. This model is supported with our  
389 experimental data, as inactivation of *gacS* improves *P. putida* fitness when cells are grown on  
390 *pCA*. Although  $\Delta$ *ttgB* had a slight fitness improvement under bioreactor conditions (**Table 2**), the  
391 indigoidine improvements were not as high as with the  $\Delta$ *gacA* strain (**Figure 3B and 3D**).  
392 PP\_0063 has been reported to play a role in the *P. putida* global stress response when cells were  
393 fed benzoate, a similar aromatic compound<sup>52</sup>.  $\Delta$ PP\_0063 strain had improved indigoidine titers  
394 compared to wild type but lesser than  $\Delta$ *gacA* strain, suggesting that inactivating the PP\_0063  
395 regulatory network is not as beneficial towards indigoidine production as a  $\Delta$ *gacA* deletion. In  
396 summary, our data suggests that final indigoidine titer is improved in the  $\Delta$ *gacA* strain because a  
397 subset of starvation response genes are induced by *pCA* without activating the full complement  
398 of GacS-GacA regulatory targets. It is the context of *pCA* vs glucose cultivation that reveals the  
399 indigoidine productivity benefit. We speculate that a renewed focus on regulatory networks in this  
400 microbe will lead to improved optimization strategies for robust growth under dynamic  
401 environmental conditions with non-native carbon streams.

402 Our study advances the field of host engineering for heterologous bioproducts by applying  
403 methods in functional genomics to characterize host physiology under industrially relevant  
404 bioreactor conditions. Beyond providing a valuable new *P. putida* strain that converts the plant-  
405 derived aromatic *pCA* to the NRP indigoidine, this study provides a robust workflow to downselect  
406 strains for examination in the lower throughput but higher scale ambr® 250 or bioreactor systems.  
407 The ambr® 250 improves our throughput to up to 12 simultaneous stirred tank runs but increasing  
408 the throughput above 24 units requires a significant capital investment. The isogenic deletion  
409 strain collection of bioreactor-advantaged mutants is ready to be screened with other  
410 heterologous gene pathways and carbon streams, such as xylose<sup>41</sup>. This functional genomics  
411 data can also help improve predictability of machine learning tools, such as ART<sup>53</sup>. Alternatively,  
412 the pooled library could be expanded to include double mutants or over-expressed genes to

413 identify additional mechanisms of improved bioreactor growth. These strategies have the potential  
414 to identify better suited microbes for use in the emerging bioeconomy.

415

## 416 Methods

### 417 *Chemicals, media and culture conditions*

418 All chemicals and reagents were purchased from Sigma-Aldrich (St. Louis, MO) unless mentioned  
419 otherwise. When cells were cultivated in a microtiter dish format, plates were sealed with a gas-  
420 permeable film (Breathe-easy Sealing membrane, Sigma-Aldrich, St. Louis, MO). Tryptone and  
421 yeast extract were purchased from BD Biosciences (Franklin Lakes, NJ). Engineered strains were  
422 grown on M9 Minimal Media (NREL Formulation)<sup>11</sup> with 10 g/L *para*-coumarate at 200 rpm at 30  
423 °C. Overnight cultures of *P. putida* were grown and adapted in 5 mL M9 Minimal Media from single  
424 colonies. After three sequential rounds of adaptation, these cultures were used to inoculate  
425 cultures for indigoidine production runs at a starting OD<sub>600</sub> of 0.1. All experiments were performed  
426 in triplicates and in different production scales. These included 200 µL culture volume in 24-  
427 deepwell plates (Axygen Scientific, Union City, CA), 2 mL culture volume in (InFors Multitron HT  
428 Double Stack Incubator Shaker), 999 rpm linear shaker, 70% humidity and 60 mL culture volume  
429 in 250 mL Erlenmeyer shake flask, 200 rpm orbital shaker). 0.3% w/v (20 mM) L-arabinose was  
430 used for (indigoidine production) induction of *bpsA-sfp* genes under the pBAD promoter.

431

### 432 *Strains and strain construction*

433 *Pseudomonas putida* KT2440 was used as the host for strain engineering. Electroporation with  
434 the respective plasmid (**Supplementary Table 6**) was performed using a BioRad MicroPulser  
435 preprogrammed EC2 setting (0.2 cm cuvettes with 100 µL cells, ~5 msec pulse and 2.5 kV).  
436 Transformed cells were allowed to recover at 25 °C for around 2.5 hours followed by plating onto  
437 selective media (containing respective antibiotics) followed by overnight incubation at 30 °C.

438 Positive clones were confirmed by genotyping the respective locus by colony PCR using Q5  
439 Polymerase (NEB, Ipswich, MA) as described in the next section.

440

#### 441 *Generation of Isogenic Deletion Strain Library*

442 Open reading frames (ORFs) targeted for gene deletion were identified from the RB-TnSeq fitness  
443 values. Allelic exchange plasmids were constructed using either backbone pEX18GM or  
444 pK18mobsacB as previously described<sup>11</sup>. All homology arms generated for allelic exchange were  
445 sequence verified with Sanger sequencing (Genewiz Technologies, Waltham, MA). Deletions in  
446 *P. putida* KT2440 were generated as described in Mohamed *et al*<sup>11</sup> using 50µg/mL kanamycin or  
447 30 µg/mL and gentamicin and subsequent counterselection on solid agar media supplemented  
448 with LB broth and 10% (w/v) sucrose. Kanamycin sensitive, sucrose resistant clones were then  
449 verified for the loss of the wild type locus using colony PCR primers flanking the targeted genomic  
450 locus using colony PCR. All primer sequences and allelic exchange plasmids are available post-  
451 publication from public-registry.jbei.org. All strains used in this study are provided in  
452 **Supplementary Table 7.**

453

#### 454 *Analytics/ Sugar Quantification - HPLC*

455 Glucose, *pCA*, and organic acids from cell cultures were measured by an 1100 Series HPLC  
456 system equipped with a 1200 Series refractive index detector (RID) (Agilent) and a Diode array  
457 detector (DAD) along with Aminex HPX-87H ion-exclusion column (300 mm length, 7.8 mm  
458 internal diameter; Bio-Rad Laboratories, Inc., Hercules, CA). 300 µL aliquots of cell cultures were  
459 removed at the indicated time points during production and filtered through a spin-cartridge with  
460 a 0.45-µm nylon membrane, and 10 µL of the filtrate was eluted through the column at 50°C with  
461 4 mM sulfuric acid at a flow rate of 600 µL/min for 30 min. Metabolites were quantified by using  
462 external standard calibration with authentic standards.

463

464 *Indigoidine Quantification*

465 Briefly, pelleted 100  $\mu$ L of cells by centrifugation at 15000 rpm for 2 min. The supernatant was  
466 discarded and 500  $\mu$ L DMSO was added to the pellet. The solution was vortexed vigorously for  
467 30 s to dissolve Indigoidine. After centrifugation at 15000 rpm for 2 min, 100  $\mu$ L of DMSO extracted  
468 indigoidine was added to 96-well flat- bottomed microplates (Corning Life Science Products,  
469 Corning, NY). Indigoidine was quantitated by measuring the optical density at 612 nm wavelength  
470 ( $OD_{612}$ ) using a microplate reader (Molecular Devices Spectramax M2E) preheated to 25  $^{\circ}$ C.  
471 Accounting for the any dilution applied, indigoidine was quantitated using the following equation

472 
$$Y(\text{g/L of indigoidine}) = 0.212 * OD_{612} - 0.0035$$

473 The purity of indigoidine samples were confirmed using H-NMR as previously described<sup>36</sup>.  
474 Indigoidine yields were calculated assuming complete utilization of glucose or *p*CA based on the  
475 amount of fed substrate in minimal media containing no other carbon sources.

476  
477 *Advanced micro bioreactor method: 250 mL ambr® 250 bioreactor cultivations*

478 Fed-batch bioreactor experiments were carried out in a 12-way ambr® 250 bioreactor system  
479 equipped with 250 mL single-use, disposable bioreactors (microbial vessel type). The vessels  
480 were initially filled with 150 mL M9 minimal salt media (NREL formulation) containing 10 g/L  
481 glucose or 8.2 g/L *p*CA as carbon source. Temperature was maintained at 30  $^{\circ}$ C throughout the  
482 fermentation process and agitation was set constant to 1300 rpm. Airflow was set constant to 0.5  
483 VVM based on the initial working volume and pH was maintained at 7.0 using 4 N NaOH. Reactors  
484 were inoculated manually with 5 mL of pre-culture cell suspension for an initial  $OD_{600}$  of ~0.1.  
485 After an initial batch phase of 12 hours, cultures were fed with a concentrated feed solution (86  
486 g/L *p*CA, 120 g/L ammonium sulfate, 50  $\mu$ g/mL kanamycin, 20 mM arabinose) by administering  
487 feed boluses every two hours restoring *p*CA concentrations to 8.2 g/L (feed parameters: 3.1 min  
488 @ 50 mL/h). Samples were taken 1-2 times every day (2 mL volume) and stored at -20  $^{\circ}$ C. The  
489 ambr® 250 runtime software and integrated liquid handler was used to execute all process steps.

490

491 *RbTnSeq fitness experiment under different bioreactor conditions*

492 RbTnSeq fitness assay/experiment was carried out as previously reported<sup>22,25</sup>. Briefly, pooled *P.*  
493 *putida* KT2440 pooled transposon libraries were thawed from 500  $\mu$ L glycerol stocks and  
494 inoculated into 25 mL LB media. Cultures were grown overnight to saturation at 30 °C with shaking  
495 (200 rpm). The culture was then subcultured three times in M9 minimal salt media to prepare the  
496 seed culture used for bioreactor inoculation. Each of the bioreactors were inoculated to a starting  
497 optical density 600 nm at  $\sim$ 0.2. A 2 L bioreactor equipped with a Sartorius BIOSTAT B®  
498 fermentation controller (Sartorius Stedim Biotech GmbH, Goettingen, Germany), fitted with two  
499 Rushton impellers fixed at an agitation speed of 800 rpm was used. The temperature was held  
500 constant at 30 °C. The bioreactor pH was monitored using the Hamilton EasyFerm Plus PHI VP  
501 225 Pt100 (Hamilton Company, Reno, NV) and was maintained at a pH of 7 using 10 M sodium  
502 hydroxide. Dissolved oxygen concentration was monitored using Hamilton VisiFerm DO ECS 225  
503 H0. Initial reactor volume was 1 L M9 Minimal Media (10 g/L glucose, 2 mM magnesium sulfate,  
504 0.1 mM calcium chloride, 12.8 g/L sodium phosphate dibasic heptahydrate, 3 g/L potassium  
505 phosphate monobasic, 0.5 g/L sodium chloride and 1 g/L ammonium chloride), and 50 mL  
506 overnight pre-culture in the same media. For fed-batch experiments, the feeding solution  
507 contained 100 g/L glucose, and 300 mM ammonium chloride. The dissolved oxygen (DO) was  
508 maintained at either 10% DO or 30% DO in respective bioreactors. The feed rate was set at 1  
509 g/hr glucose and 3 mM NH<sub>4</sub>Cl with at 10% or 30% DO as indicated. 1 mL samples were  
510 harvested, and a cell pellet was collected by centrifugation. Refer to Table 1 for a full description  
511 of parameters used in each experiment. As needed, a 1 mL bolus of anti-foam B (Sigma Aldrich)  
512 was injected into the bioreactor to control excessive foam formation. Several bioreactor runs were  
513 excluded from this analysis if the barcode diversity in the RB-TnSeq data pipeline failed quality  
514 check steps. Genomic DNA was extracted and processed for library generation and barcode



515 quantification by Illumina sequencing as previously described<sup>22</sup>. The fitness data described in this  
516 work will be available upon publication at <http://fit.genomics.lbl.gov>.

517 To assess the statistical significance of each fitness value, a *t*-like test statistic (*t*-score)  
518 of the form  $\text{fitness}/\sqrt{\text{estimated variance}}$  was used as described previously in Wetmore *et al*<sup>22</sup>.  
519 A gene was considered to have an enhanced fitness phenotype in an experiment if  $\text{fitness} > 1.5$ ,  
520  $t > 2$  and have a fitness defect when fitness value was  $< -2$ ,  $t < -2$  (and  $|\text{fitness}| > 95\text{th}$   
521  $\text{percentile}(|\text{fitness}|) + 0.5$ , as described previously<sup>54</sup>). Hierarchical clustering and heatmap  
522 visualization in Figure 1 and 2 were done using Python library Seaborn 0.11.1<sup>55</sup>.

523

524 *Constraint Based modeling to select metabolic gene deletion strains*

525 *Pseudomonas putida* KT2440 genome scale metabolic model (GSM) iJN1462<sup>35</sup> was modified to  
526 account for indigoidine biosynthesis and used to identify a gene knockout strategy that impacted  
527 indigoidine flux. Aerobic growth with either glucose or *para*-coumarate (*pCA*) as the sole carbon  
528 source was used to model growth. The ATP maintenance demand was kept the same (0.97  
529 mmol/gDW/h) whereas glucose uptake rate and *pCA* uptake rate were set at 6.3 mmol/gDW/h<sup>56</sup>  
530 and 4.04 mmol/gDW/h<sup>57</sup> respectively. Flux Balance Analysis (FBA) was used to calculate the  
531 maximum theoretical yield (MTY) from reaction stoichiometry and redox balance and also for  
532 single gene deletion analysis. Minimization of metabolic adjustment (MOMA) analysis<sup>28</sup> was used  
533 to predict single gene deletion with minimum perturbation in the metabolic flux distribution  
534 compared to wild type. Flux variability analysis (FVA) was used to check for minimum and  
535 maximum indigoidine flux for each gene deletion strain. COBRA Toolbox v.3.0<sup>58</sup> in MATLAB  
536 R2017b was used for FBA, FVA and MOMA simulations with the GLPK  
537 (<https://gnu.org/software/glpk>) or Gurobi optimization solvers.

538 **List of Supplementary Tables, Figures, and Datasets.**

539 **Supplementary Table 1:** Details for candidate deletion strains identified from Rb-TnSeq mutant  
540 library in bioreactor cultivation with enhanced fitness. Each precise deletion contains a common  
541 ~250bp sequence of DNA derived from the budding yeast *SMC1* gene and a unique 10bp DNA  
542 sequence to aid in identification.

543 **Supplementary Table 2:** Genome-scale metabolic model derived maximum theoretical yield of  
544 alpha-ketoglutarate, glutamine and indigoidine from glucose or *para*-coumarate (*pCA*) with  
545 respect to stoichiometry and redox balance in *P. putida*.

546 **Supplementary Table 3:** Evaluation of gene deletion targets with enhanced fitness from RB-  
547 TnSeq profiling for impact on indigoidine production

548 **Supplementary Table 4:** Fitness profile of PP\_4099 mutant across other conditions in the RB-  
549 TnSeq fitness browser. Refer to Figure 4A.

550 **Supplementary Table 5:** Bioinformatic analysis of potential GacA regulated genes in *P. putida*  
551 compared to the *P. aeruginosa* regulatory network for GacA as described by Huang *et al*, 2019<sup>43</sup>.

552 **Supplementary Table 6:** List of plasmids used in this study.

553 **Supplementary Table 7:** List of strains used in this study.

554 **Supplementary Figure 1.** Metabolic pathway showing utilization of glucose or the lignin derived  
555 aromatic *para*-coumarate (*pCA*) for the production of heterologous bioproduct indigoidine.  
556 Indigoidine is derived from the TCA intermediate alpha-ketoglutarate (AKG) via two molecules of  
557 glutamine. Adapted from Johnson *et al*, 2019<sup>12</sup>.

558 **Supplementary Figure 2:** Indigoidine production in  $\Delta$ PP\_2889 and  $\Delta$ PP\_1109 deletion strains.

559 Production of indigoidine from a genomically integrated pathway was conducted as described in  
560 Figure 5.

561 **Supplementary Figure 3:** String database connectivity map of PP\_4099/*gacA*. Genes  
562 represented on the left connectivity map by their respective gene names are PP\_0401/*ksgA*,  
563 PP\_1623/*rpoS*, PP\_1650/*gacS*, PP\_1656/*relA*, PP\_4097/*pgsA*, PP\_4098/*uvrC* and  
564 PP\_4099/*gacA*. Lower left subnetwork in the right connectivity map represents genes involved in  
565 glutamate/glutamine biosynthesis. Genes represented by their respective gene names are  
566 PP\_0675/*gdhA*, PP\_5075/*gltD* and PP\_5076/*gltB*.

567 **Supplementary Figure 4.** A Systems Biology Approach to Characterize Determinants of  
568 Bioreactor Fitness. A. Workflow to identify and build new platform strains with increased  
569 bioreactor fitness using transposon mutant library. B. We used our mutant library to study the

570 efficient bioconversion of lignin derived aromatic monomer, *para*-coumarate, into a higher value  
571 product, a renewable pigment, indigoidine. A representative *P. putida* clone expressing the  
572 heterologous indigoidine pathway is shown. C. Strain productivity was characterized at both  
573 laboratory and industrially relevant scales.

574 **Supplementary Data 1:** RBTnSeq gene mutants with decreased fitness.

575 **Supplementary Data 2:** RBTnSeq gene mutants with increased fitness.

576

577 **Data availability:**

578 Data supporting the findings of this work are available within the paper and its supplementary  
579 information files. The fitness data described in this work will be available upon publication at  
580 <http://fit.genomics.lbl.gov>. A reporting summary for this article is available as a supplementary  
581 information file. List of plasmids used in this study are described in **Supplementary Table 6** and  
582 their sequences are available at [public-registry.jbei.org](http://public-registry.jbei.org) (registration of a free account is required).  
583 All strains used in this study are described in **Supplementary Table 7** and may be also requested  
584 from [public-registry.jbei.org](http://public-registry.jbei.org). Additional requests for datasets and strains generated and analyzed  
585 during the current study are available from the corresponding author upon request.

586

587 **Acknowledgements:**

588

589 We thank Christopher J. Petzold, Ashish Misra, Megan Garber, Alex Codik, and members of the  
590 Mukhopadhyay group for constructive feedback and technical assistance on this work. We also  
591 thank Jim Colton (Graphpad Software, San Diego, CA) for assistance using Prism Graphpad for  
592 data visualization. The work conducted by the U.S. Department of Energy Joint Genome Institute,  
593 a DOE Office of Science User Facility, is supported by the Office of Science of the U.S.  
594 Department of Energy under Contract No. DE-AC02-05CH11231.

595

596 **Author contributions:**

597 Conceptualization of the project: AM, TE, DB. Strain construction, molecular biology, indigoidine  
598 quantification: TE, AL, RH, EB and JT. Contributed critical reagents: TE, RH. Interpreted results:  
599 AM, TE, AL, RH, DB, AD. RbTnSeq fitness experiment using bioreactors: TE, AL, RH. Ambr250  
600 Fed-Batch Production: AL, JPP, TE and DT. Implementation of Computational Methods: DB.  
601 Drafted the manuscript: TE, DB, AM. Raised funds: AM and DT. All authors contributed to and  
602 provided feedback on the manuscript and approved the final manuscript.

603 **Competing interests:**

604 Authors declare no competing financial or non-financial interests.

605

606 **References**

- 607 1. Crater, J. S. & Lievens, J. C. Scale-up of industrial microbial processes. *FEMS Microbiol.*  
608 *Lett.* **365**, (2018).
- 609 2. Baral, N. R. *et al.* Approaches for more efficient biological conversion of lignocellulosic  
610 feedstocks to biofuels and bioproducts. *ACS Sustain. Chem. Eng.* **7**, 9062–9079 (2019).
- 611 3. Baral, N. R. *et al.* Techno-economic analysis and life-cycle greenhouse gas mitigation cost  
612 of five routes to bio-jet fuel blendstocks. *Energy Environ. Sci.* **12**, 807–824 (2019).
- 613 4. Sun, Z., Fridrich, B., de Santi, A., Elangovan, S. & Barta, K. Bright side of lignin  
614 depolymerization: toward new platform chemicals. *Chem. Rev.* **118**, 614–678 (2018).
- 615 5. Park, M. *et al.* Response of *Pseudomonas putida* to Complex, Aromatic-Rich Fractions  
616 from Biomass. *ChemSusChem* **13**, 1–14 (2020).
- 617 6. Nakazawa, T. Travels of a *Pseudomonas*, from Japan around the world. *Environ. Microbiol.*  
618 **4**, 782–786 (2002).
- 619 7. Bagdasarian, M. *et al.* Specific-purpose plasmid cloning vectors. II. Broad host range, high  
620 copy number, RSF1010-derived vectors, and a host-vector system for gene cloning in  
621 *Pseudomonas*. *Gene* **16**, 237–247 (1981).

- 622 8. Linger, J. G. *et al.* Lignin valorization through integrated biological funneling and chemical  
623 catalysis. *Proc Natl Acad Sci USA* **111**, 12013–12018 (2014).
- 624 9. Calero, P. *et al.* Genome-wide identification of tolerance mechanisms toward p-coumaric  
625 acid in *Pseudomonas putida*. *Biotechnol. Bioeng.* **115**, 762–774 (2018).
- 626 10. Jiménez, J. I., Miñambres, B., García, J. L. & Díaz, E. Genomic analysis of the aromatic  
627 catabolic pathways from *Pseudomonas putida* KT2440. *Environ. Microbiol.* **4**, 824–841  
628 (2002).
- 629 11. Mohamed, E. T. *et al.* Adaptive laboratory evolution of *Pseudomonas putida* KT2440  
630 improves p-coumaric and ferulic acid catabolism and tolerance. *Metab. Eng. Commun.* **11**,  
631 e00143 (2020).
- 632 12. Johnson, C. W. *et al.* Innovative Chemicals and Materials from Bacterial Aromatic Catabolic  
633 Pathways. *Joule* (2019). doi:10.1016/j.joule.2019.05.011
- 634 13. Johnson, C. W. *et al.* Eliminating a global regulator of carbon catabolite repression  
635 enhances the conversion of aromatic lignin monomers to muconate in *Pseudomonas putida*  
636 KT2440. *Metab. Eng. Commun.* **5**, 19–25 (2017).
- 637 14. Follonier, S. Pilot-scale Production of Functionalized mcl-PHA from Grape Pomace  
638 Supplemented with Fatty Acids. *Chem.Biochem.Eng.Q.* **29**, 113–121 (2015).
- 639 15. Wehrs, M. *et al.* Investigation of Bar-seq as a method to study population dynamics of  
640 *Saccharomyces cerevisiae* deletion library during bioreactor cultivation. *Microb. Cell Fact.*  
641 **19**, 167 (2020).
- 642 16. Wehrs, M. *et al.* Engineering Robust Production Microbes for Large-Scale Cultivation.  
643 *Trends Microbiol.* **27**, 524–537 (2019).
- 644 17. Nickel, P. I. & de Lorenzo, V. Engineering an anaerobic metabolic regime in *Pseudomonas*  
645 *putida* KT2440 for the anoxic biodegradation of 1,3-dichloroprop-1-ene. *Metab. Eng.* **15**,  
646 98–112 (2013).
- 647 18. Jensen, H. M., Eng, T., Chubukov, V., Herbert, R. A. & Mukhopadhyay, A. Improving

- 648 membrane protein expression and function using genomic edits. *Sci. Rep.* **7**, 13030 (2017).
- 649 19. Lieder, S., Nickel, P. I., de Lorenzo, V. & Takors, R. Genome reduction boosts heterologous  
650 gene expression in *Pseudomonas putida*. *Microb. Cell Fact.* **14**, 23 (2015).
- 651 20. Price, M. N. *et al.* Oxidative pathways of deoxyribose and deoxyribonate catabolism.  
652 *mSystems* **4**, (2019).
- 653 21. González-Cabaleiro, R., Mitchell, A. M., Smith, W., Wipat, A. & Ofițeru, I. D. Heterogeneity  
654 in pure microbial systems: experimental measurements and modeling. *Front. Microbiol.* **8**,  
655 1813 (2017).
- 656 22. Wetmore, K. M. *et al.* Rapid quantification of mutant fitness in diverse bacteria by  
657 sequencing randomly bar-coded transposons. *MBio* **6**, e00306-15 (2015).
- 658 23. Thompson, M. G. *et al.* Massively Parallel Fitness Profiling Reveals Multiple Novel  
659 Enzymes in *Pseudomonas putida* Lysine Metabolism. *MBio* **10**, (2019).
- 660 24. Incha, M. R. *et al.* Leveraging host metabolism for bisdemethoxycurcumin production in  
661 *Pseudomonas putida*. *Metab. Eng. Commun.* **10**, e00119 (2020).
- 662 25. Eng, T. *et al.* Iron Supplementation Eliminates Antagonistic Interactions Between Root-  
663 Associated Bacteria. *Front. Microbiol.* **11**, 1742 (2020).
- 664 26. Mozejko-Ciesielska, J., Pokoj, T. & Ciesielski, S. Transcriptome remodeling of  
665 *Pseudomonas putida* KT2440 during mcl-PHAs synthesis: effect of different carbon sources  
666 and response to nitrogen stress. *J. Ind. Microbiol. Biotechnol.* **45**, 433–446 (2018).
- 667 27. Fernández, M. *et al.* Mechanisms of resistance to chloramphenicol in *Pseudomonas putida*  
668 KT2440. *Antimicrob. Agents Chemother.* **56**, 1001–1009 (2012).
- 669 28. Segrè, D., Vitkup, D. & Church, G. M. Analysis of optimality in natural and perturbed  
670 metabolic networks. *Proc Natl Acad Sci USA* **99**, 15112–15117 (2002).
- 671 29. Pecoraro, V., Zerulla, K., Lange, C. & Soppa, J. Quantification of ploidy in proteobacteria  
672 revealed the existence of monoploid, (mero-)oligoploid and polyploid species. *PLoS ONE* **6**,  
673 e16392 (2011).

- 674 30. Pang, B. *et al.* Investigation of Indigoidine Synthetase Reveals a Conserved Active-Site  
675 Base Residue of Nonribosomal Peptide Synthetase Oxidases. *J. Am. Chem. Soc.* **142**,  
676 10931–10935 (2020).
- 677 31. Takahashi, H. *et al.* Cloning and characterization of a *Streptomyces* single module type  
678 non-ribosomal peptide synthetase catalyzing a blue pigment synthesis. *J. Biol. Chem.* **282**,  
679 9073–9081 (2007).
- 680 32. Wehrs, M. *et al.* Production efficiency of the bacterial non-ribosomal peptide indigoidine  
681 relies on the respiratory metabolic state in *S. cerevisiae*. *Microb. Cell Fact.* **17**, 193 (2018).
- 682 33. von Kamp, A. & Klamt, S. Growth-coupled overproduction is feasible for almost all  
683 metabolites in five major production organisms. *Nat. Commun.* **8**, 15956 (2017).
- 684 34. Feist, A. M. *et al.* Model-driven evaluation of the production potential for growth-coupled  
685 products of *Escherichia coli*. *Metab. Eng.* **12**, 173–186 (2010).
- 686 35. Nogales, J. *et al.* High-quality genome-scale metabolic modelling of *Pseudomonas putida*  
687 highlights its broad metabolic capabilities. *Environ. Microbiol.* **22**, 255–269 (2020).
- 688 36. Banerjee, D. *et al.* Genome-scale metabolic rewiring improves titers rates and yields of the  
689 non-native product indigoidine at scale. *Nat. Commun.* **11**, 5385 (2020).
- 690 37. Duque, E., Segura, A., Mosqueda, G. & Ramos, J. L. Global and cognate regulators control  
691 the expression of the organic solvent efflux pumps TtgABC and TtgDEF of *Pseudomonas*  
692 *putida*. *Mol. Microbiol.* **39**, 1100–1106 (2001).
- 693 38. Maia, P., Rocha, M. & Rocha, I. In Silico Constraint-Based Strain Optimization Methods:  
694 the Quest for Optimal Cell Factories. *Microbiol. Mol. Biol. Rev.* **80**, 45–67 (2016).
- 695 39. Abe, F. & Minegishi, H. Global screening of genes essential for growth in high-pressure and  
696 cold environments: searching for basic adaptive strategies using a yeast deletion library.  
697 *Genetics* **178**, 851–872 (2008).
- 698 40. Jaishankar, J. & Srivastava, P. Molecular basis of stationary phase survival and  
699 applications. *Front. Microbiol.* **8**, 2000 (2017).

- 700 41. Elmore, J. R. *et al.* Engineered *Pseudomonas putida* simultaneously catabolizes five major  
701 components of corn stover lignocellulose: Glucose, xylose, arabinose, p-coumaric acid, and  
702 acetic acid. *Metab. Eng.* **62**, 62–71 (2020).
- 703 42. Gellatly, S. L. *et al.* Novel roles for two-component regulatory systems in cytotoxicity and  
704 virulence-related properties in *Pseudomonas aeruginosa*. *AIMS Microbiol.* **4**, 173–191  
705 (2018).
- 706 43. Huang, H. *et al.* An integrated genomic regulatory network of virulence-related  
707 transcriptional factors in *Pseudomonas aeruginosa*. *Nat. Commun.* **10**, 2931 (2019).
- 708 44. Francis, V. I., Stevenson, E. C. & Porter, S. L. Two-component systems required for  
709 virulence in *Pseudomonas aeruginosa*. *FEMS Microbiol. Lett.* **364**, (2017).
- 710 45. Bentley, G. J. *et al.* Engineering glucose metabolism for enhanced muconic acid production  
711 in *Pseudomonas putida* KT2440. *Metab. Eng.* **59**, 64–75 (2020).
- 712 46. Nickel, P. I., Chavarría, M., Fuhrer, T., Sauer, U. & de Lorenzo, V. *Pseudomonas putida*  
713 KT2440 Strain Metabolizes Glucose through a Cycle Formed by Enzymes of the Entner-  
714 Doudoroff, Embden-Meyerhof-Parnas, and Pentose Phosphate Pathways. *J. Biol. Chem.*  
715 **290**, 25920–25932 (2015).
- 716 47. Sonnleitner, E. & Haas, D. Small RNAs as regulators of primary and secondary metabolism  
717 in *Pseudomonas* species. *Appl. Microbiol. Biotechnol.* **91**, 63–79 (2011).
- 718 48. González, N. *et al.* Genome-wide search reveals a novel GacA-regulated small RNA in  
719 *Pseudomonas* species. *BMC Genomics* **9**, 167 (2008).
- 720 49. Szklarczyk, D. *et al.* STRING v11: protein-protein association networks with increased  
721 coverage, supporting functional discovery in genome-wide experimental datasets. *Nucleic*  
722 *Acids Res.* **47**, D607–D613 (2019).
- 723 50. Vercellone-Smith, P. & Herson, D. S. Toluene Elicits a Carbon Starvation Response in  
724 *Pseudomonas putida* mt-2 Containing the TOL Plasmid pWW0. *Appl. Environ. Microbiol.*  
725 **63**, 1925–1932 (1997).



- 726 51. Whistler, C. A., Corbell, N. A., Sarniguet, A., Ream, W. & Loper, J. E. The two-component  
727 regulators GacS and GacA influence accumulation of the stationary-phase sigma factor  
728 sigmaS and the stress response in *Pseudomonas fluorescens* Pf-5. *J. Bacteriol.* **180**,  
729 6635–6641 (1998).
- 730 52. Reva, O. N. *et al.* Functional genomics of stress response in *Pseudomonas putida* KT2440.  
731 *J. Bacteriol.* **188**, 4079–4092 (2006).
- 732 53. Radivojević, T., Costello, Z., Workman, K. & Garcia Martin, H. A machine learning  
733 Automated Recommendation Tool for synthetic biology. *Nat. Commun.* **11**, 4879 (2020).
- 734 54. Price, M. N. *et al.* Mutant phenotypes for thousands of bacterial genes of unknown function.  
735 *Nature* **557**, 503–509 (2018).
- 736 55. Waskom, M. *et al.* mwaskom/seaborn: v0.11.1 (December 2020). *Zenodo* (2020).  
737 doi:10.5281/zenodo.4379347
- 738 56. del Castillo, T. *et al.* Convergent peripheral pathways catalyze initial glucose catabolism in  
739 *Pseudomonas putida*: genomic and flux analysis. *J. Bacteriol.* **189**, 5142–5152 (2007).
- 740 57. Ravi, K., García-Hidalgo, J., Gorwa-Grauslund, M. F. & Lidén, G. Conversion of lignin  
741 model compounds by *Pseudomonas putida* KT2440 and isolates from compost. *Appl.*  
742 *Microbiol. Biotechnol.* **101**, 5059–5070 (2017).
- 743 58. Heirendt, L. *et al.* Creation and analysis of biochemical constraint-based models using the  
744 COBRA Toolbox v.3.0. *Nat. Protoc.* **14**, 639–702 (2019).
